# Supplementary material
Source: MDPI journal article supplement (https://www.mdpi.com/2076-3417/11/10/4501)
Supplement: s1 [file s1]

## Supplementary Materials

**Table S1.** Meteorological parameters, seasonal and annual concentrations of PM<sub>10</sub> (µg m<sup>-3</sup>) and PAHs (ng m<sup>-3</sup>).

|                                        | Summer (hot/humid)                                           |               |               | Rainy season                                                 |               |               | Winter (cool/dry)                   |               |               | Annual               |               |               |
|----------------------------------------|--------------------------------------------------------------|---------------|---------------|--------------------------------------------------------------|---------------|---------------|-------------------------------------|---------------|---------------|----------------------|---------------|---------------|
|                                        | Roadside                                                     | Industrial    | Urban bg      | Roadside                                                     | Industrial    | Urban bg      | Roadside                            | Industrial    | Urban bg      | Roadside             | Industrial    | Urban bg      |
| Sampling duration                      | 2 May 2013 to 14 May 2013<br>21 February 2014 to 14 May 2014 |               |               | 20 May 2013 to 11 October 2013<br>21 May 2014 to 27 May 2014 |               |               | 17 October 2013 to 14 February 2014 |               |               | May 2013 to May 2014 |               |               |
| Sample (n)                             | 14                                                           | 11            | 15            | 21                                                           | 15            | 19            | 8                                   | 11            | 12            | 43                   | 37            | 46            |
| T (C)                                  | 33 ± 1.3                                                     | 31.4 ± 1.3    | 30.8 ± 2.3    | 30.7 ± 1.4                                                   | 29.5 ± 1.2    | 27.9 ± 3.1    | 29.3 ± 2.5                          | 27.3 ± 2.7    | 26.9 ± 2.3    | 31.16 ± 2.13         | 29.46 ± 2.33  | 28.52 ± 3.02  |
| %RH                                    | 64 ± 6                                                       | 64 ± 6        | 61 ± 9        | 70 ± 7                                                       | 72 ± 7        | 75 ± 6        | 60 ± 10                             | 65 ± 13       | 67 ± 10       | 66 ± 8               | 67 ± 9        | 68 ± 11       |
| PM <sub>10</sub> (µg m <sup>-3</sup> ) | 44.98 ± 14.96                                                | 67.91 ± 15.31 | 37.56 ± 18.33 | 50.52 ± 18.66                                                | 39.96 ± 26.24 | 31.85 ± 15.07 | 92.03 ± 35.27                       | 79.03 ± 32.45 | 55.18 ± 28.93 | 56.44 ± 27.29        | 50.96 ± 31.12 | 39.80 ± 22.17 |
| PAHs (ng m <sup>-3</sup> )             |                                                              |               |               |                                                              |               |               |                                     |               |               |                      |               |               |
| ACY                                    | 0.02 ± 0.04                                                  | 0.02 ± 0.03   | 0.02 ± 0.02   | 0.07 ± 0.06                                                  | 0.05 ± 0.05   | 0.02 ± 0.03   | 0.04 ± 0.02                         | 0.08 ± 0.03   | 0.01 ± 0.01   | 0.04 ± 0.05          | 0.05 ± 0.04   | 0.02 ± 0.02   |
| ACE                                    | 0.007 ± 0.010                                                | <LOQ          | <LOQ          | 0.04 ± 0.05                                                  | <LOQ          | 0.004 ± 0.009 | <LOQ                                | 0.002 ± 0.007 | <LOQ          | 0.02 ± 0.04          | 0.001 ± 0.004 | 0.001 ± 0.01  |
| FLU                                    | 0.004 ± 0.009                                                | 0.003 ± 0.006 | 0.01 ± 0.03   | 0.07 ± 0.08                                                  | 0.03 ± 0.09   | 0.04 ± 0.08   | 0.07 ± 0.03                         | 0.03 ± 0.02   | 0.03 ± 0.05   | 0.05 ± 0.08          | 0.02 ± 0.06   | 0.03 ± 0.06   |
| PHE                                    | 0.09 ± 0.03                                                  | 0.04 ± 0.02   | 0.07 ± 0.07   | 0.22 ± 0.15                                                  | 0.10 ± 0.15   | 0.08 ± 0.08   | 0.35 ± 0.13                         | 0.14 ± 0.05   | 0.13 ± 0.07   | 0.20 ± 0.14          | 0.09 ± 0.10   | 0.09 ± 0.08   |
| ANT                                    | 0.03 ± 0.06                                                  | 0.004 ± 0.008 | <LOQ          | 0.09 ± 0.10                                                  | 0.02 ± 0.06   | 0.01 ± 0.01   | 0.05 ± 0.02                         | 0.03 ± 0.01   | 0.02 ± 0.01   | 0.06 ± 0.08          | 0.02 ± 0.04   | 0.01 ± 0.01   |
| FLT                                    | 0.12 ± 0.16                                                  | 0.05 ± 0.02   | 0.03 ± 0.03   | 0.28 ± 0.25                                                  | 0.12 ± 0.15   | 0.08 ± 0.03   | 0.29 ± 0.12                         | 0.19 ± 0.11   | 0.12 ± 0.11   | 0.21 ± 0.21          | 0.12 ± 0.12   | 0.07 ± 0.07   |
| PYR                                    | 0.11 ± 0.04                                                  | 0.07 ± 0.03   | 0.07 ± 0.03   | 0.21 ± 0.11                                                  | 0.11 ± 0.08   | 0.10 ± 0.04   | 0.35 ± 0.14                         | 0.22 ± 0.08   | 0.15 ± 0.07   | 0.19 ± 0.12          | 0.13 ± 0.09   | 0.10 ± 0.06   |
| BaA                                    | 0.04 ± 0.04                                                  | 0.04 ± 0.03   | 0.02 ± 0.03   | 0.18 ± 0.25                                                  | 0.25 ± 0.36   | 0.23 ± 0.37   | 0.23 ± 0.13                         | 0.12 ± 0.04   | 0.07 ± 0.03   | 0.12 ± 0.18          | 0.15 ± 0.24   | 0.12 ± 0.25   |
| CHR                                    | 0.09 ± 0.06                                                  | 0.06 ± 0.06   | 0.05 ± 0.10   | 0.28 ± 0.20                                                  | 0.12 ± 0.07   | 0.15 ± 0.07   | 0.33 ± 0.20                         | 0.12 ± 0.04   | 0.11 ± 0.06   | 0.23 ± 0.18          | 0.10 ± 0.06   | 0.11 ± 0.09   |
| BbF                                    | 0.39 ± 0.26                                                  | 0.31 ± 0.15   | 0.11 ± 0.16   | 0.95 ± 0.60                                                  | 0.65 ± 0.41   | 0.45 ± 0.24   | 1.13 ± 0.47                         | 0.70 ± 0.30   | 0.41 ± 0.16   | 0.76 ± 0.53          | 0.56 ± 0.36   | 0.33 ± 0.25   |
| BkF                                    | 0.08 ± 0.06                                                  | 0.07 ± 0.05   | 0.03 ± 0.05   | 0.11 ± 0.12                                                  | 0.11 ± 0.15   | 0.06 ± 0.07   | 0.29 ± 0.11                         | 0.22 ± 0.08   | 0.11 ± 0.05   | 0.12 ± 0.12          | 0.13 ± 0.12   | 0.06 ± 0.07   |
| BaP                                    | 0.24 ± 0.26                                                  | 0.19 ± 0.09   | 0.15 ± 0.09   | 0.55 ± 0.44                                                  | 0.45 ± 0.36   | 0.34 ± 0.27   | 0.68 ± 0.28                         | 0.38 ± 0.16   | 0.20 ± 0.08   | 0.47 ± 0.39          | 0.35 ± 0.27   | 0.24 ± 0.19   |
| IP                                     | 0.61 ± 0.36                                                  | 0.75 ± 0.08   | 0.77 ± 0.39   | 1.11 ± 0.75                                                  | 1.21 ± 0.57   | 0.51 ± 0.32   | 1.38 ± 0.43                         | 1.46 ± 0.60   | 0.61 ± 0.22   | 0.96 ± 0.62          | 1.15 ± 0.56   | 0.62 ± 0.34   |
| DBA                                    | 0.03 ± 0.02                                                  | 0.14 ± 0.20   | 0.03 ± 0.05   | 0.02 ± 0.03                                                  | 0.11 ± 0.22   | 0.02 ± 0.02   | <LOQ                                | 0.55 ± 0.21   | 0.05 ± 0.02   | 0.02 ± 0.03          | 0.25 ± 0.28   | 0.03 ± 0.04   |
| BP                                     | 0.76 ± 0.35                                                  | 0.42 ± 0.21   | 0.27 ± 0.22   | 1.39 ± 0.90                                                  | 0.77 ± 0.42   | 0.60 ± 0.32   | 1.65 ± 0.50                         | 0.93 ± 0.45   | 0.43 ± 0.20   | 1.20 ± 0.70          | 0.71 ± 0.42   | 0.45 ± 0.30   |
| 7PAHs                                  | 1.49 ± 0.63                                                  | 1.57 ± 0.34   | 1.17 ± 0.54   | 3.20 ± 1.53                                                  | 2.89 ± 1.47   | 1.76 ± 0.98   | 4.04 ± 1.50                         | 3.55 ± 1.36   | 1.55 ± 0.56   | 2.80 ± 1.60          | 2.69 ± 1.42   | 1.51 ± 0.79   |
| 15PAHs                                 | 2.63 ± 1.20                                                  | 2.18 ± 0.53   | 1.64 ± 0.77   | 5.56 ± 2.69                                                  | 4.09 ± 1.95   | 2.68 ± 1.34   | 6.84 ± 2.41                         | 5.15 ± 1.97   | 2.44 ± 0.98   | 4.68 ± 2.51          | 3.84 ± 2.01   | 2.28 ± 1.16   |

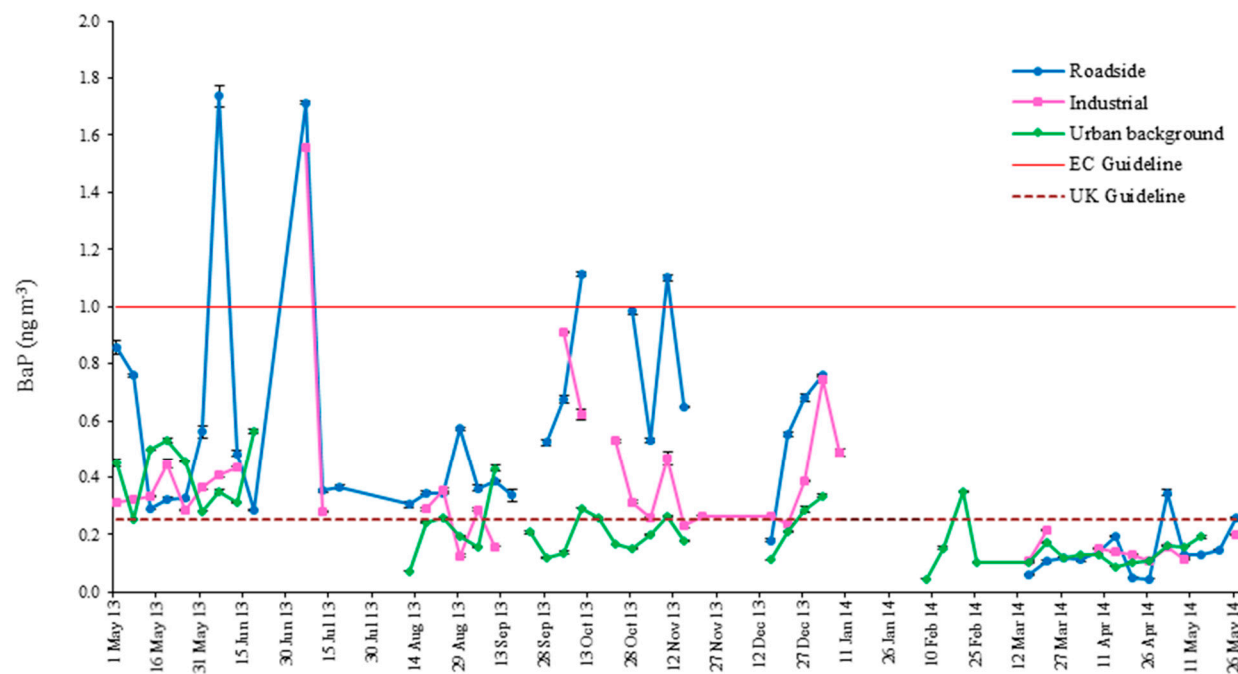

**Figure S1.** Daily mean concentrations of BaP (ng m<sup>-3</sup>) at the roadside, industrial and urban background sites compared with the EC (1 ng m<sup>-3</sup>) and UK (0.25 ng m<sup>-3</sup>) annual average guidelines.

**Table S2** Concentrations of PM<sub>10</sub> (µg m<sup>-3</sup>) and BaP (ng m<sup>-3</sup>) in different countries.

| Country   | Sampling area (type)   | Sampling duration             | PM <sub>10</sub> (µg m <sup>-3</sup> ) | BaP (ng m <sup>-3</sup> ) | Reference                               |
|-----------|------------------------|-------------------------------|----------------------------------------|---------------------------|-----------------------------------------|
| Argentina | Buanos Aires           | 13 August – 15 September 2008 | 61 ± 49                                | 1.0 ± 0.1                 | Vasconcellos <i>et al.</i> (2011)       |
| Brazil    | Sãl Paolo              | 7 – 29 August 2008            | 64 ± 19                                | 2.2 ± 2.1                 | Vasconcellos <i>et al.</i> (2011)       |
| Chile     | Santiago (urban)       | 7 – 9 July 2002               | 129.4 ± 28.1                           | 5.28                      | Del Rosario Sienra <i>et al.</i> (2005) |
|           |                        | 27 September – 7 October 2002 | 64.2 ± 17.1                            | 0.93                      |                                         |
| Colombia  | Bogotá                 | 24 November – 9 December 2008 | 47 ± 12                                | 0.7 ± 0.2                 | Vasconcellos <i>et al.</i> (2011)       |
| Finland   | Virolahti (background) | January 2007 – September 2008 | 9.91                                   | 0.23                      | Vestenius <i>et al.</i> (2011)          |
| India     | Raipur region          | January – December 2006       | 115 ± 36                               | 0.04 - 29.7 <sup>a</sup>  | Giri <i>et al.</i> (2013)               |
| India     | Delhi                  | December 2009 – November 2010 | 222.23 ± 30                            | 13.13 ± 5.91              | Jyethi, Khillare and Sarkar (2014)      |
| Italy     | Milan                  | Winter 2007                   | 92 ± 12                                | 1.4 ± 0.33                | Belis <i>et al.</i> (2011)              |
| Italy     | Milan                  | Winter 2009                   | 85 ± 16                                | 1.2 ± 0.35                | Belis <i>et al.</i> (2011)              |
| Mexico    | México City            | October 1998 – October 1999   | -                                      | 0.69 ± 0.41               | Amador-Muñoz <i>et al.</i> (2010)       |
| Malaysia  | Kuala Lumpur (urban)   | June – September 2010         | 51.52 ± 19.9                           | 0.11 ± 0.03               | Jamhari <i>et al.</i> (2014)            |

**Table S3.** Annual mean pPAHs concentrations, BaP-TEQ concentrations and percentage of BaP-TEQ concentrations.

| PAH   | TEF    | Roadside                         |                                  |                | Industrial                       |                                  |                | Urban Background                 |                                  |                |
|-------|--------|----------------------------------|----------------------------------|----------------|----------------------------------|----------------------------------|----------------|----------------------------------|----------------------------------|----------------|
|       |        | Ambient<br>(ng m <sup>-3</sup> ) | BaP-TEQ<br>(ng m <sup>-3</sup> ) | BaP-TEQ<br>(%) | Ambient<br>(ng m <sup>-3</sup> ) | BaP-TEQ<br>(ng m <sup>-3</sup> ) | BaP-TEQ<br>(%) | Ambient<br>(ng m <sup>-3</sup> ) | BaP-TEQ<br>(ng m <sup>-3</sup> ) | BaP-TEQ<br>(%) |
| FLU   | 0.0005 | 0.05                             | 0.000025                         | 0.003          | 0.02                             | 0.00001                          | 0.001          | 0.03                             | 0.000015                         | 0.004          |
| PHE   | 0.0005 | 0.20                             | 0.0001                           | 0.014          | 0.09                             | 0.000045                         | 0.005          | 0.09                             | 0.000045                         | 0.012          |
| ANT   | 0.0005 | 0.06                             | 0.00003                          | 0.004          | 0.02                             | 0.00001                          | 0.001          | 0.01                             | 0.000005                         | 0.001          |
| FLT   | 0.05   | 0.23                             | 0.0115                           | 1.590          | 0.12                             | 0.006                            | 0.726          | 0.07                             | 0.0035                           | 0.903          |
| PYR   | 0.001  | 0.20                             | 0.0002                           | 0.028          | 0.13                             | 0.00013                          | 0.016          | 0.10                             | 0.0001                           | 0.026          |
| BaA   | 0.005  | 0.15                             | 0.00075                          | 0.104          | 0.15                             | 0.00075                          | 0.091          | 0.12                             | 0.0006                           | 0.155          |
| CHR   | 0.03   | 0.23                             | 0.0069                           | 0.954          | 0.10                             | 0.003                            | 0.363          | 0.11                             | 0.0033                           | 0.851          |
| BbF   | 0.1    | 0.80                             | 0.08                             | 11.063         | 0.56                             | 0.056                            | 6.774          | 0.33                             | 0.033                            | 8.515          |
| BkF   | 0.05   | 0.14                             | 0.007                            | 0.968          | 0.13                             | 0.0065                           | 0.786          | 0.06                             | 0.003                            | 0.774          |
| BaP   | 1      | 0.47                             | 0.47                             | 64.997         | 0.35                             | 0.35                             | 42.340         | 0.24                             | 0.24                             | 61.925         |
| IP    | 0.1    | 1.00                             | 0.1                              | 13.829         | 1.15                             | 0.115                            | 13.912         | 0.62                             | 0.062                            | 15.997         |
| DBA   | 1.1    | 0.02                             | 0.022                            | 3.042          | 0.25                             | 0.275                            | 33.267         | 0.03                             | 0.033                            | 8.515          |
| BP    | 0.02   | 1.23                             | 0.0246                           | 3.402          | 0.71                             | 0.0142                           | 1.718          | 0.45                             | 0.009                            | 2.322          |
| Total |        | 4.78                             | 0.72                             |                | 3.78                             | 0.83                             |                | 2.26                             | 0.39                             |                |

The correlation between between PM10 and total PAHs show a positive correlation between PM10 and total PAHs at the industrial site ( $R^2 = 0.61$ ) but poor correlations at the roadside and urban background sites (supplementary information figure 3). Despite small sample numbers in each season, positive correlations between PM10 and total PAHs at the industrial site were observed in the winter ( $R^2 = 0.62$ ) and rainy season ( $R^2 = 0.80$ ) (supplementary information figure 4). No correlations between PM10 and PAHs were observed in the summer where  $R^2$  were 0.01, 0.09 and 0.27 respectively for roadside, industrial and urban background sites.

Seasonal high PM10 concentrations were observed in the winter particularly at the roadside and industrial sites where PM10 mean concentrations were double those in other seasons. Seasonal wind directions at each site (supplementary information figure 5) prevail from the south-southwest in the summer (hot and humid) and the rainy season, and for the cool and dry winter season, prevailing winds at the roadside and industrial sites were from the north-northeast. PAHs have little distinct variations with wind direction suggesting pPAHs were associated with fine particles emitted in the vicinity of each sampling site. Elevated PM10 concentrations during cool-dry weather conditions suggested long-range transportation of particles.

Fine particles are usually emitted from high temperature combustion sources. A previous study on size distribution of PM in Bangkok suggested that more than 97% of PAHs were found in the very-fine particle  $<0.95 \mu\text{m}$  which contributed to approximately 48% of total PM weight (Thongsanit et al., 2003). This implied that pPAHs found at the roadside and urban background sites in this study were likely distributed in the smaller particle size range than PM10. On the contrary, coarse particles were a major contributor of pPAHs at the industrial site. A good correlation of PM10 and pPAHs observed at the urban background site in the winter implied a better conservation of PAHs compositions after dispersal from sources. In addition to the winter (dry/cool) weather conditions that promote the suspension of particulate matter, the cool climate and less solar radiation may disfavour the photochemical degradation of pPAHs compared to other seasons.

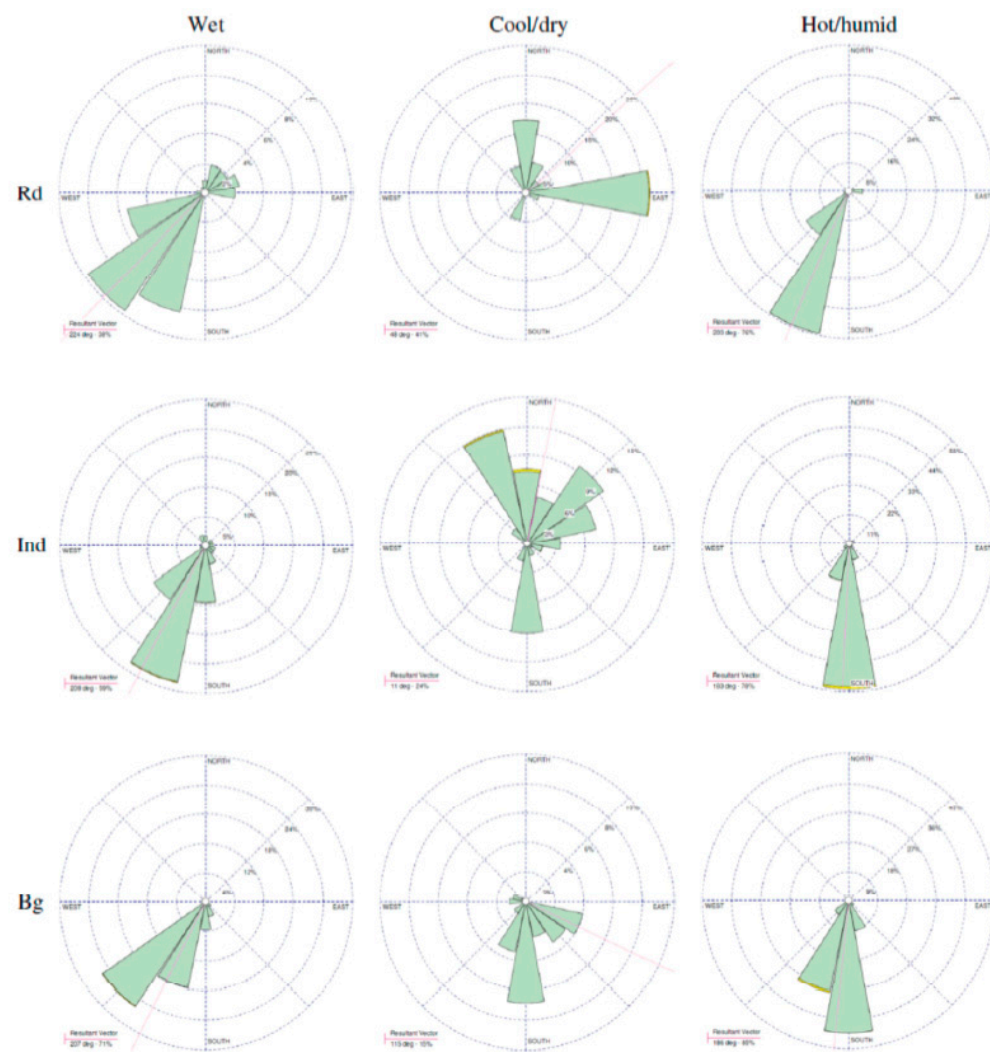

**Figure S2.** Dominant wind directions for each site in each of the 3 seasons. No statistical relationship between the wind patterns and the PAHs measured were found.

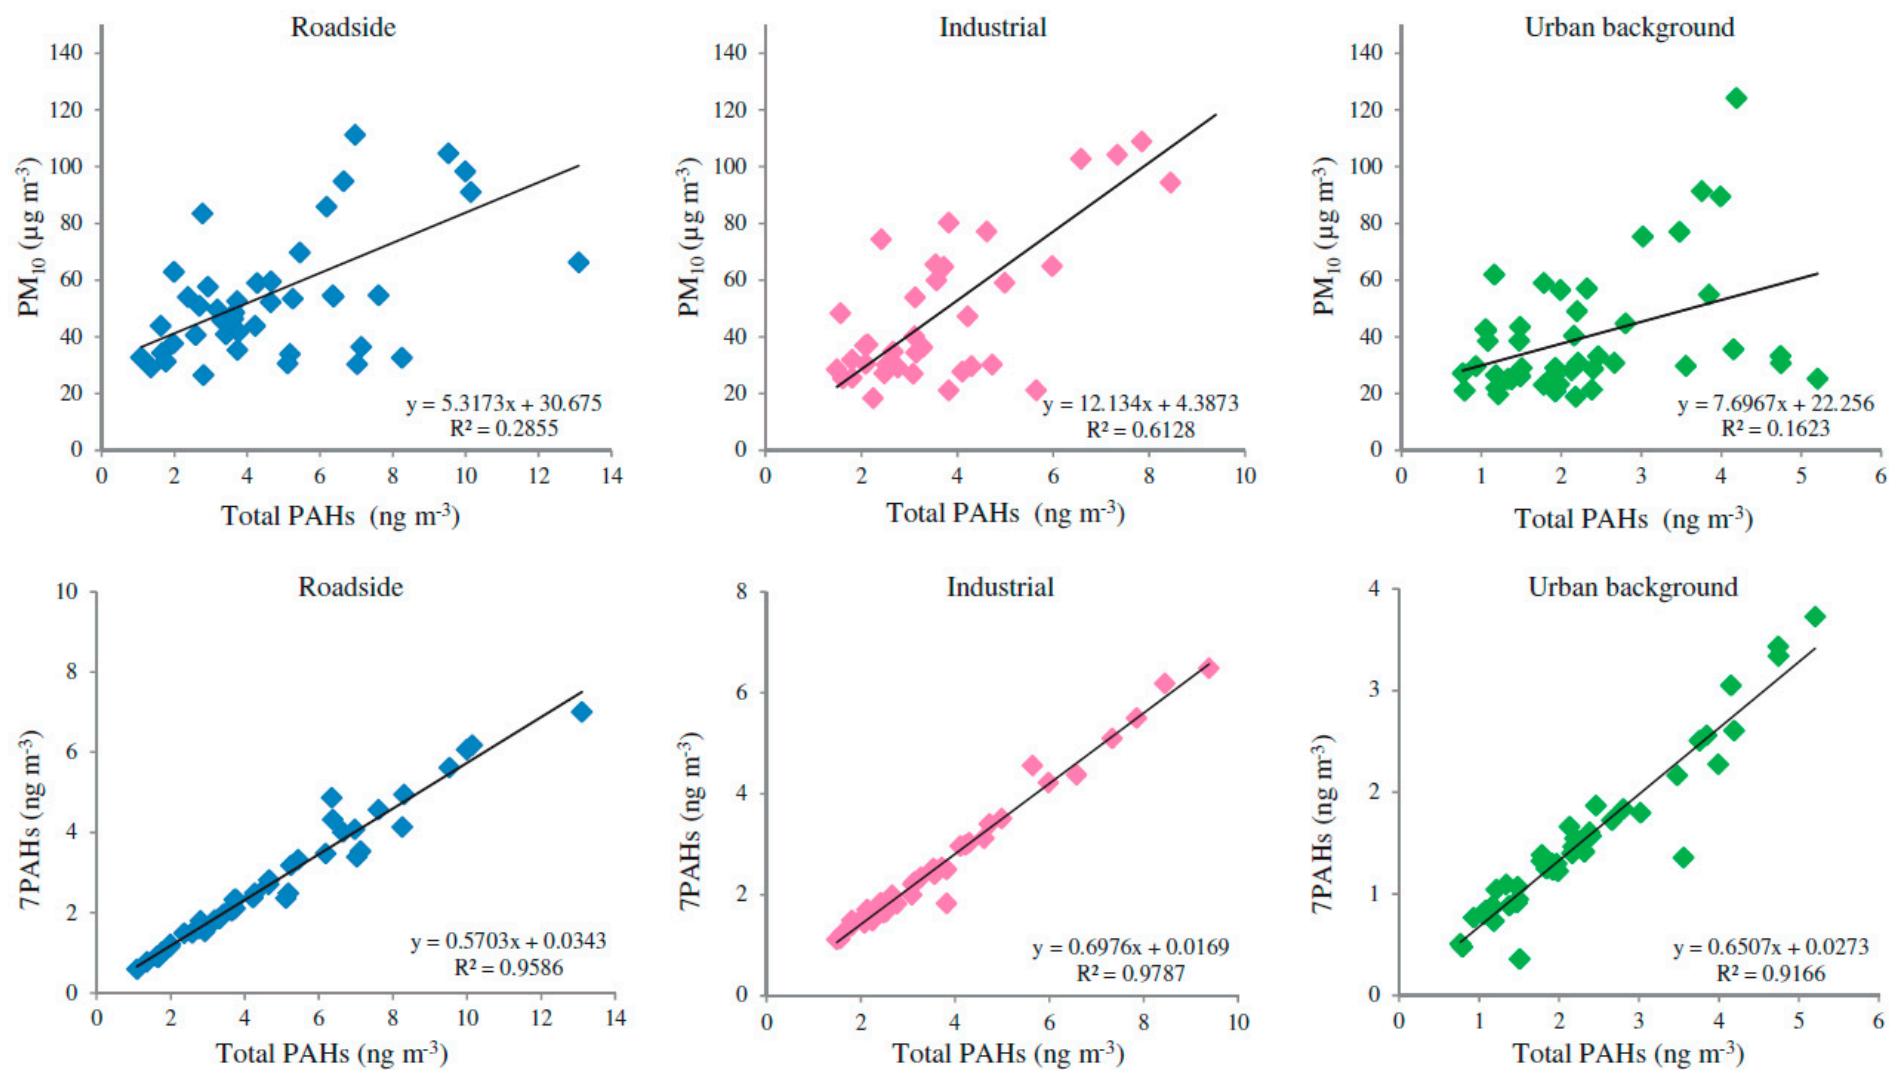

**Figure S3.** Linear correlation plots between PM10 vs. total PAHs from whole year data.

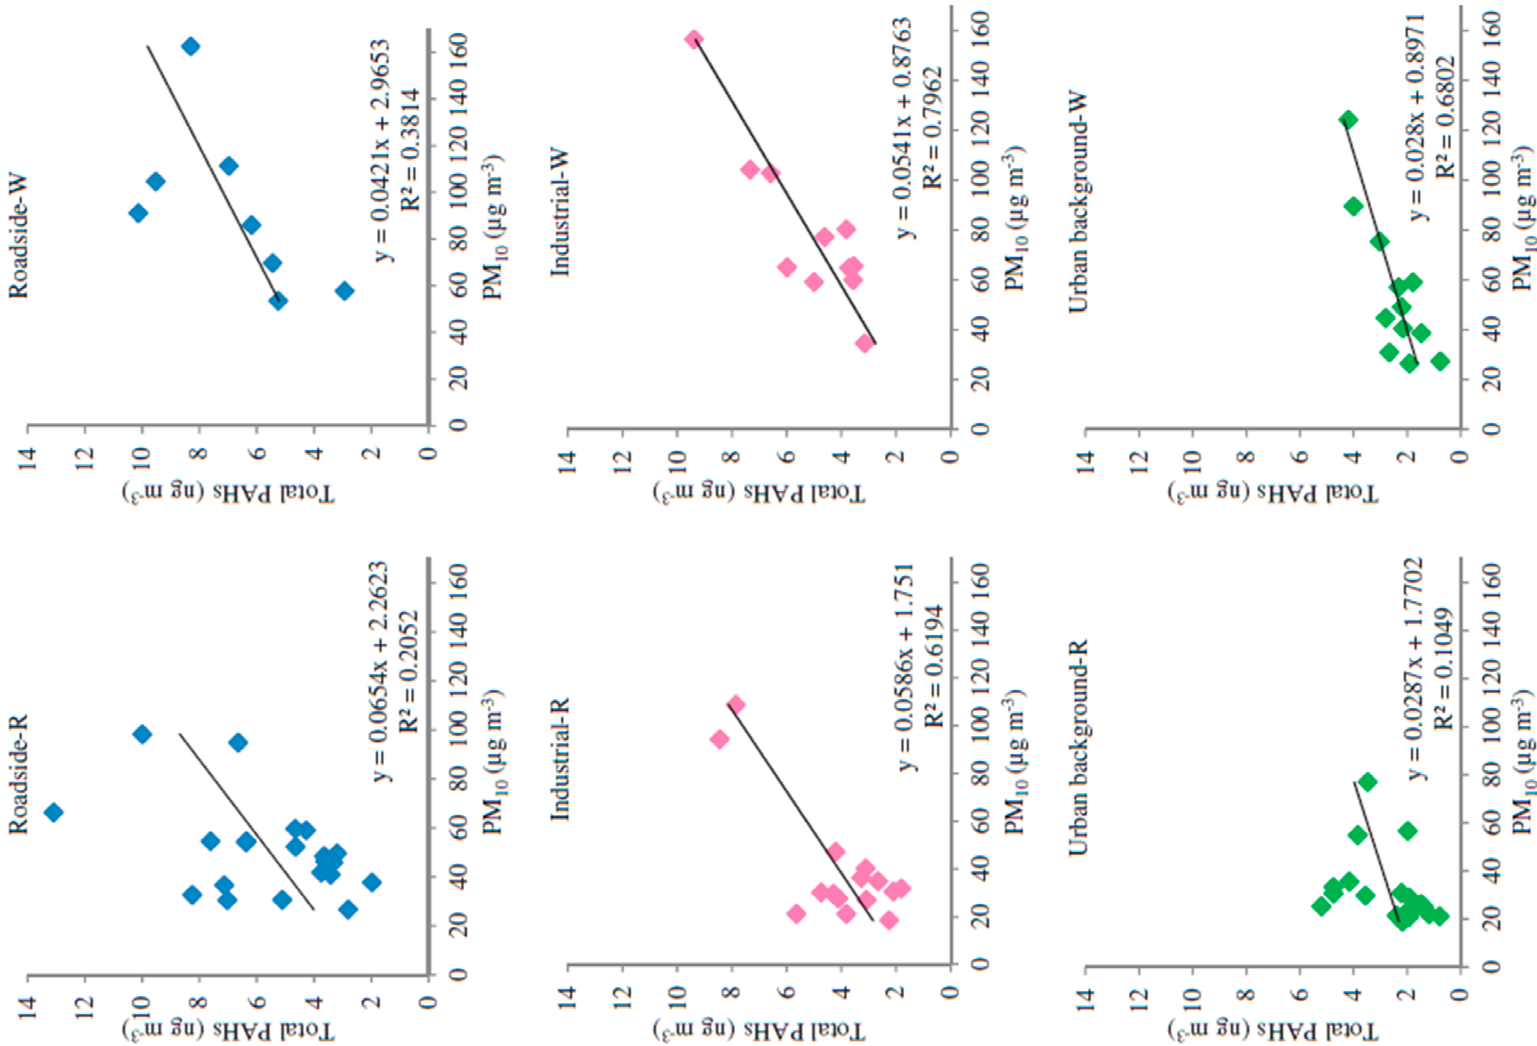

Figure S4. Seasonal correlation plots between PM10 and total PAHs concentrations in the wet season (R) and cool-dry season (W) at the three sampling sites.



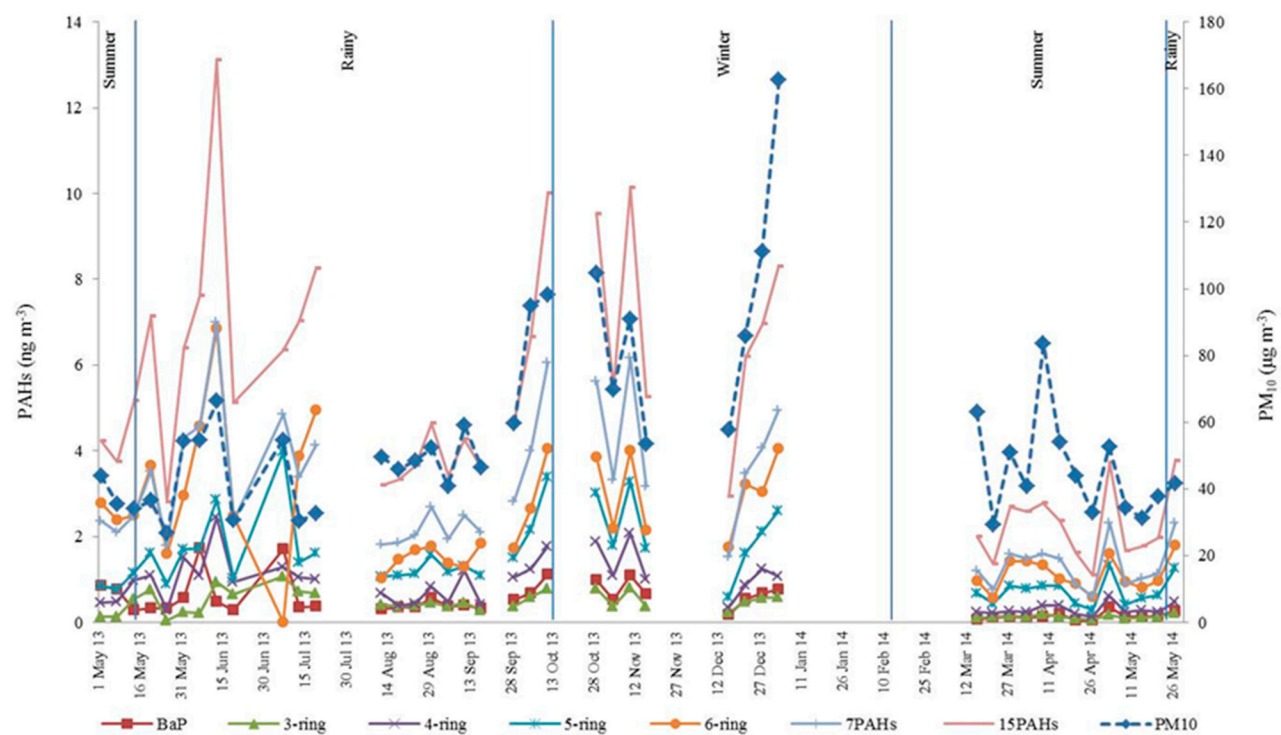

**Figure S5a.** Time series plot of daily mean  $\text{PM}_{10}$  ( $\mu\text{g m}^{-3}$ ) and PAHs ( $\text{ng m}^{-3}$ ) concentrations at the roadside site. (Missing data indicted sampling failures where  $\text{PM}_{10}$  filters were not collected.)

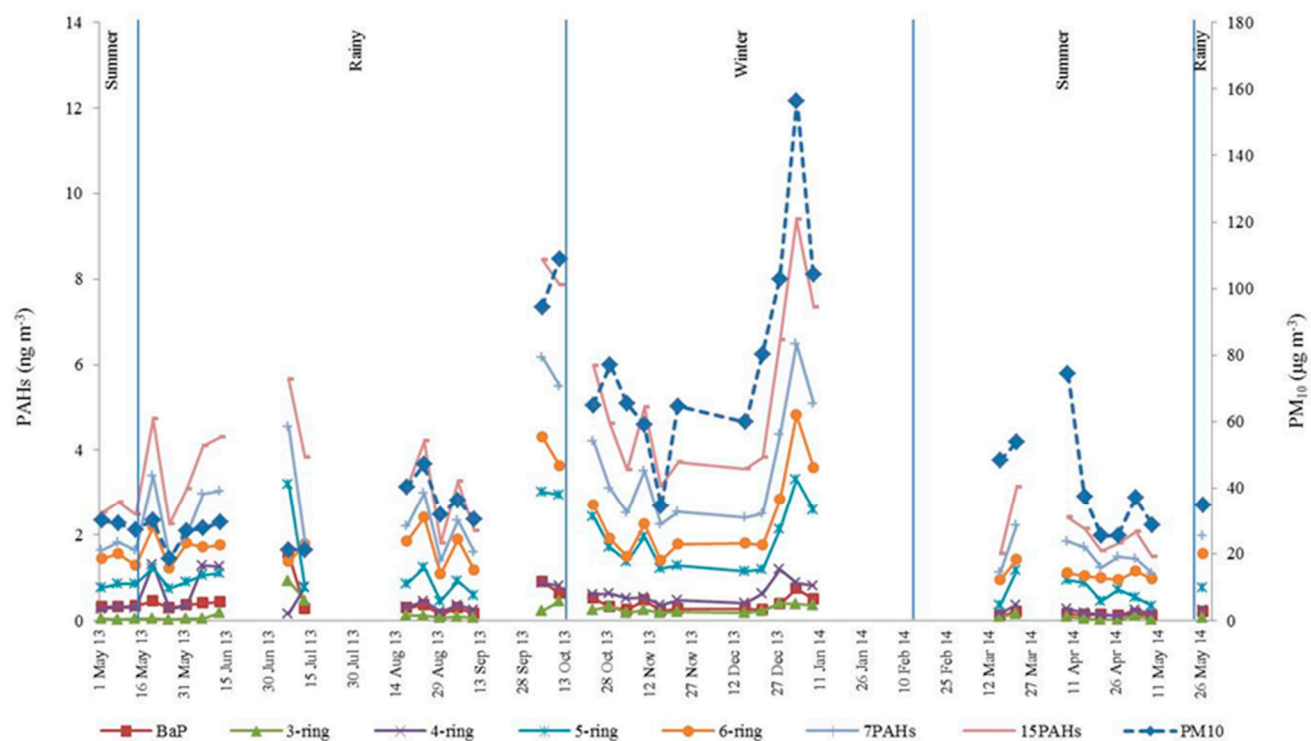

**Figure S5b.** Time series plot of daily mean PM<sub>10</sub> ( $\mu\text{g m}^{-3}$ ) and PAHs ( $\text{ng m}^{-3}$ ) concentrations at the industrial site. (Missing data indicated sampling failures where PM<sub>10</sub> filters were not collected.)

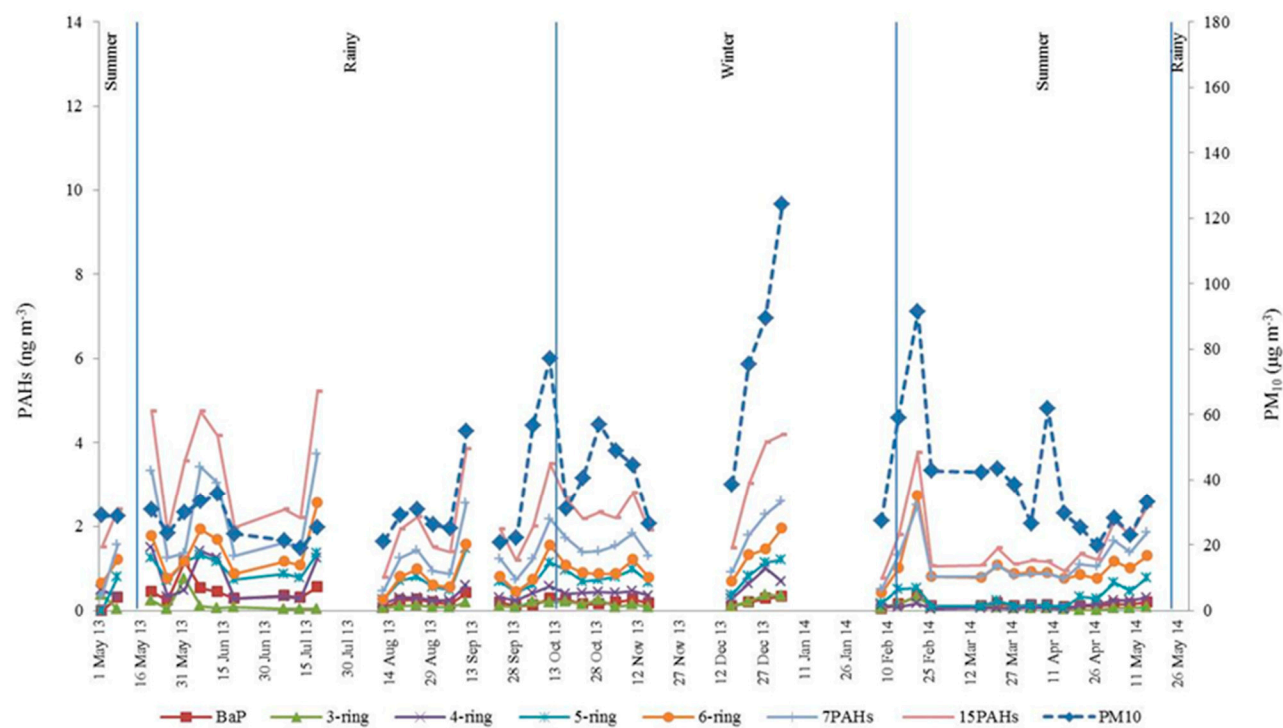

**Figure S5c.** Time series plot of daily mean PM<sub>10</sub> (µg m<sup>-3</sup>) and PAHs (ng m<sup>-3</sup>) concentrations at the urban background site. (Missing data indicated sampling failures where PM<sub>10</sub> filters were not collected.)
